# Supplementary material
Source: publisher figshare collection journal article supplement (https://acs.figshare.com/ndownloader/files/5701659)
Supplement: Supplementary file 1 [file 5701659]

  
data_dg58 
  
_audit_creation_method            SHELXTL 
_chemical_name_systematic 
; 
 ? 
; 
_chemical_name_common             ? 
_chemical_melting_point           ? 
_chemical_formula_moiety          ? 
_chemical_formula_sum 
 'C28 H20 Ag4 F24 O10' 
_chemical_formula_weight          1403.92 
  
loop_ 
 _atom_type_symbol 
 _atom_type_description 
 _atom_type_scat_dispersion_real 
 _atom_type_scat_dispersion_imag 
 _atom_type_scat_source 
 'C'  'C'   0.0033   0.0016 
 'International Tables Vol C Tables 4.2.6.8 and 6.1.1.4' 
 'H'  'H'   0.0000   0.0000 
 'International Tables Vol C Tables 4.2.6.8 and 6.1.1.4' 
 'O'  'O'   0.0106   0.0060 
 'International Tables Vol C Tables 4.2.6.8 and 6.1.1.4' 
 'F'  'F'   0.0171   0.0103 
 'International Tables Vol C Tables 4.2.6.8 and 6.1.1.4' 
 'Ag'  'Ag'  -0.8971   1.1015 
 'International Tables Vol C Tables 4.2.6.8 and 6.1.1.4' 
  
_symmetry_cell_setting            Triclinic 
_symmetry_space_group_name_H-M    P-1 
  
loop_ 
 _symmetry_equiv_pos_as_xyz 
 'x, y, z' 
 '-x, -y, -z' 
  
_cell_length_a                    8.0252(3) 
_cell_length_b                    11.2091(4) 
_cell_length_c                    12.5306(5) 
_cell_angle_alpha                 109.0870(10) 
_cell_angle_beta                  106.2580(10) 
_cell_angle_gamma                 94.9270(10) 
_cell_volume                      1002.88(7) 
_cell_formula_units_Z             1 
_cell_measurement_temperature     161(2) 
_cell_measurement_reflns_used     ? 
_cell_measurement_theta_min       ? 
_cell_measurement_theta_max       ? 
  
_exptl_crystal_description        Rod 
_exptl_crystal_colour             colorless 
_exptl_crystal_size_max           0.31 
_exptl_crystal_size_mid           0.17 
_exptl_crystal_size_min           0.09 
_exptl_crystal_density_meas       none 
_exptl_crystal_density_diffrn     2.325 
_exptl_crystal_density_method     'not measured' 
_exptl_crystal_F_000              672 
_exptl_absorpt_coefficient_mu     2.088 
_exptl_absorpt_correction_type    multi-scan 
_exptl_absorpt_correction_T_min   0.5638 
_exptl_absorpt_correction_T_max   0.8344 
_exptl_absorpt_process_details    'Bruker SADABS' 
  
_exptl_special_details 
; 
 ? 
; 
  
_diffrn_ambient_temperature       161(2) 
_diffrn_radiation_wavelength      0.71073 
_diffrn_radiation_type            MoK\a 
_diffrn_radiation_source          'sealed tube' 
_diffrn_radiation_monochromator   graphite 
_diffrn_measurement_device_type   'CCD area detector' 
_diffrn_measurement_method        'omega scans' 
_diffrn_detector_area_resol_mean  ? 
_diffrn_standards_number          '50 frames' 
_diffrn_standards_interval_count  'initial 50 frames recollected' 
_diffrn_standards_interval_time   ? 
_diffrn_standards_decay_%         '< 1.0' 
_diffrn_reflns_number             10703 
_diffrn_reflns_av_R_equivalents   0.0188 
_diffrn_reflns_av_sigmaI/netI     0.0212 
_diffrn_reflns_limit_h_min        -9 
_diffrn_reflns_limit_h_max        10 
_diffrn_reflns_limit_k_min        -14 
_diffrn_reflns_limit_k_max        14 
_diffrn_reflns_limit_l_min        -16 
_diffrn_reflns_limit_l_max        16 
_diffrn_reflns_theta_min          1.96 
_diffrn_reflns_theta_max          28.28 
_reflns_number_total              4713 
_reflns_number_gt                 4133 
_reflns_threshold_expression      >2sigma(I) 
  
_computing_data_collection        'Bruker SMART' 
_computing_cell_refinement        'Bruker SMART/SAINT' 
_computing_data_reduction         'Bruker SAINT' 
_computing_structure_solution     'Bruker SHELXTL' 
_computing_structure_refinement   'Bruker SHELXTL' 
_computing_molecular_graphics     'Bruker SHELXTL' 
_computing_publication_material   'Bruker SHELXTL' 
  
_refine_special_details 
; 
 Refinement of F^2^ against ALL reflections.  The weighted R-factor wR and 
 goodness of fit S are based on F^2^, conventional R-factors R are based 
 on F, with F set to zero for negative F^2^. The threshold expression of 
 F^2^ > 2sigma(F^2^) is used only for calculating R-factors(gt) etc. and is 
 not relevant to the choice of reflections for refinement.  R-factors based 
 on F^2^ are statistically about twice as large as those based on F, and R- 
 factors based on ALL data will be even larger. 
; 
  
_refine_ls_structure_factor_coef  Fsqd 
_refine_ls_matrix_type            full 
_refine_ls_weighting_scheme       calc 
_refine_ls_weighting_details 
 'calc w=1/[\s^2^(Fo^2^)+(0.0454P)^2^+2.1746P] where P=(Fo^2^+2Fc^2^)/3' 
_atom_sites_solution_primary      direct 
_atom_sites_solution_secondary    difmap 
_atom_sites_solution_hydrogens    geom 
_refine_ls_hydrogen_treatment     constr 
_refine_ls_extinction_method      SHELXTL 
_refine_ls_extinction_coef        0.0026(5) 
_refine_ls_extinction_expression 
 'Fc^*^=kFc[1+0.001xFc^2^\l^3^/sin(2\q)]^-1/4^' 
_refine_ls_number_reflns          4713 
_refine_ls_number_parameters      295 
_refine_ls_number_restraints      1 
_refine_ls_R_factor_all           0.0386 
_refine_ls_R_factor_gt            0.0329 
_refine_ls_wR_factor_ref          0.0895 
_refine_ls_wR_factor_gt           0.0851 
_refine_ls_goodness_of_fit_ref    1.039 
_refine_ls_restrained_S_all       1.040 
_refine_ls_shift/su_max           0.001 
_refine_ls_shift/su_mean          0.000 
  
loop_ 
 _atom_site_label 
 _atom_site_type_symbol 
 _atom_site_fract_x 
 _atom_site_fract_y 
 _atom_site_fract_z 
 _atom_site_U_iso_or_equiv 
 _atom_site_adp_type 
 _atom_site_occupancy 
 _atom_site_symmetry_multiplicity 
 _atom_site_calc_flag 
 _atom_site_refinement_flags 
 _atom_site_disorder_assembly 
 _atom_site_disorder_group 
Ag1 Ag 0.77200(4) -0.18546(3) -0.26922(2) 0.03717(10) Uani 1 1 d . . . 
Ag2 Ag 0.79509(3) -0.01112(2) 0.03544(2) 0.02850(10) Uani 1 1 d . . . 
O1 O 0.9288(3) -0.1794(2) -0.0758(2) 0.0312(5) Uani 1 1 d . . . 
O2 O 1.0552(3) -0.0310(2) 0.1737(2) 0.0340(5) Uani 1 1 d . . . 
O3 O 0.5757(3) -0.0895(2) -0.1658(2) 0.0332(5) Uani 1 1 d . . . 
O4 O 0.6618(3) 0.1665(2) 0.0292(2) 0.0305(5) Uani 1 1 d . . . 
O5 O 0.7216(5) -0.3085(4) -0.4595(3) 0.0643(10) Uani 1 1 d . . . 
C1 C 0.9633(5) -0.3953(3) -0.1362(4) 0.0365(8) Uani 1 1 d . . . 
C2 C 0.9893(4) -0.2635(3) -0.0383(3) 0.0293(7) Uani 1 1 d . . . 
C3 C 1.0714(4) -0.2505(3) 0.0800(3) 0.0298(7) Uani 1 1 d . . . 
H3A H 1.1112 -0.3224 0.0957 0.036 Uiso 1 1 calc R . . 
C4 C 1.0968(4) -0.1367(3) 0.1753(3) 0.0306(7) Uani 1 1 d . . . 
C5 C 1.1833(6) -0.1351(4) 0.3016(4) 0.0428(9) Uani 1 1 d . . . 
C6 C 0.3091(5) -0.1294(5) -0.3239(4) 0.0449(9) Uani 1 1 d . . . 
C7 C 0.4451(5) -0.0424(4) -0.2017(3) 0.0322(7) Uani 1 1 d . . . 
C8 C 0.4060(5) 0.0771(4) -0.1479(3) 0.0315(7) Uani 1 1 d . . . 
H8A H 0.2952 0.0948 -0.1844 0.038 Uiso 1 1 calc R . . 
C9 C 0.5231(4) 0.1734(3) -0.0414(3) 0.0294(7) Uani 1 1 d . . . 
C10 C 0.4807(5) 0.3103(4) -0.0118(4) 0.0402(9) Uani 1 1 d . . . 
C11 C 0.7322(14) -0.4474(9) -0.5007(9) 0.061(2) Uiso 0.60 1 d P A 1 
H11A H 0.8547 -0.4589 -0.4685 0.073 Uiso 0.60 1 calc PR A 1 
H11B H 0.6530 -0.4963 -0.4748 0.073 Uiso 0.60 1 calc PR A 1 
C12 C 0.6755(15) -0.4899(10) -0.6301(10) 0.075(3) Uiso 0.60 1 d P A 1 
H12A H 0.5528 -0.5401 -0.6655 0.090 Uiso 0.60 1 calc PR A 1 
H12B H 0.7539 -0.5448 -0.6619 0.090 Uiso 0.60 1 calc PR A 1 
C13 C 0.6859(17) -0.3689(13) -0.6602(11) 0.080(3) Uiso 0.60 1 d P A 1 
H13A H 0.5713 -0.3720 -0.7183 0.096 Uiso 0.60 1 calc PR A 1 
H13B H 0.7782 -0.3664 -0.6982 0.096 Uiso 0.60 1 calc PR A 1 
C14 C 0.7296(15) -0.2444(9) -0.5473(9) 0.059(2) Uiso 0.60 1 d P A 1 
H14A H 0.8486 -0.1931 -0.5268 0.071 Uiso 0.60 1 calc PR A 1 
H14B H 0.6396 -0.1900 -0.5554 0.071 Uiso 0.60 1 calc PR A 1 
C11B C 0.802(2) -0.4107(16) -0.5033(14) 0.068(4) Uiso 0.40 1 d P A 2 
H11C H 0.7291 -0.4942 -0.5192 0.081 Uiso 0.40 1 calc PR A 2 
H11D H 0.9210 -0.4015 -0.4465 0.081 Uiso 0.40 1 calc PR A 2 
C12B C 0.816(3) -0.399(2) -0.6211(18) 0.096(5) Uiso 0.40 1 d PD A 2 
H12C H 0.9417 -0.3738 -0.6114 0.115 Uiso 0.40 1 calc PR A 2 
H12D H 0.7692 -0.4847 -0.6863 0.115 Uiso 0.40 1 calc PR A 2 
C13B C 0.721(4) -0.308(3) -0.655(3) 0.152(12) Uiso 0.40 1 d PD A 2 
H13C H 0.6229 -0.3483 -0.7321 0.182 Uiso 0.40 1 calc PR A 2 
H13D H 0.7987 -0.2359 -0.6569 0.182 Uiso 0.40 1 calc PR A 2 
C14B C 0.658(3) -0.2711(18) -0.5522(16) 0.077(5) Uiso 0.40 1 d P A 2 
H14C H 0.6793 -0.1759 -0.5194 0.092 Uiso 0.40 1 calc PR A 2 
H14D H 0.5284 -0.3017 -0.5832 0.092 Uiso 0.40 1 calc PR A 2 
F1 F 0.7970(4) -0.4571(3) -0.1743(3) 0.0812(11) Uani 1 1 d . . . 
F2 F 1.0642(4) -0.4725(2) -0.1022(2) 0.0520(6) Uani 1 1 d . . . 
F3 F 1.0007(5) -0.3826(3) -0.2295(2) 0.0610(8) Uani 1 1 d . . . 
F4 F 1.0723(5) -0.1102(4) 0.3638(3) 0.0833(11) Uani 1 1 d . . . 
F5 F 1.3263(4) -0.0423(3) 0.3614(3) 0.0681(8) Uani 1 1 d . . . 
F6 F 1.2317(5) -0.2438(3) 0.3052(3) 0.0735(10) Uani 1 1 d . . . 
F7 F 0.1831(5) -0.1962(5) -0.3103(3) 0.1101(17) Uani 1 1 d . . . 
F8 F 0.3790(5) -0.1999(4) -0.3945(3) 0.1068(16) Uani 1 1 d . . . 
F9 F 0.2202(7) -0.0630(4) -0.3822(3) 0.1192(19) Uani 1 1 d . . . 
F10 F 0.5248(5) 0.3724(3) 0.1035(3) 0.0849(12) Uani 1 1 d . . . 
F11 F 0.3122(3) 0.3119(2) -0.0604(3) 0.0544(7) Uani 1 1 d . . . 
F12 F 0.5719(4) 0.3779(3) -0.0537(4) 0.0710(10) Uani 1 1 d . . . 
  
loop_ 
 _atom_site_aniso_label 
 _atom_site_aniso_U_11 
 _atom_site_aniso_U_22 
 _atom_site_aniso_U_33 
 _atom_site_aniso_U_23 
 _atom_site_aniso_U_13 
 _atom_site_aniso_U_12 
Ag1 0.04369(18) 0.03666(17) 0.02603(15) 0.00605(11) 0.00824(12) 0.01439(12) 
Ag2 0.02819(14) 0.02868(14) 0.03074(15) 0.01345(11) 0.00789(10) 0.01199(10) 
O1 0.0334(12) 0.0304(12) 0.0325(12) 0.0150(10) 0.0089(10) 0.0124(10) 
O2 0.0341(13) 0.0316(12) 0.0350(13) 0.0140(11) 0.0055(10) 0.0123(10) 
O3 0.0332(13) 0.0386(13) 0.0308(12) 0.0146(11) 0.0107(10) 0.0143(10) 
O4 0.0275(11) 0.0316(12) 0.0381(13) 0.0176(10) 0.0122(10) 0.0109(9) 
O5 0.084(3) 0.067(2) 0.0345(16) 0.0072(15) 0.0149(16) 0.0371(19) 
C1 0.0380(19) 0.0303(17) 0.043(2) 0.0130(16) 0.0149(16) 0.0113(15) 
C2 0.0253(15) 0.0283(16) 0.0388(18) 0.0142(14) 0.0143(14) 0.0079(12) 
C3 0.0289(16) 0.0310(16) 0.0384(18) 0.0197(15) 0.0144(14) 0.0107(13) 
C4 0.0270(16) 0.0363(17) 0.0350(17) 0.0201(15) 0.0106(13) 0.0098(13) 
C5 0.051(2) 0.048(2) 0.037(2) 0.0241(18) 0.0137(18) 0.0185(19) 
C6 0.036(2) 0.059(3) 0.0332(19) 0.0111(18) 0.0076(16) 0.0102(18) 
C7 0.0318(17) 0.0413(19) 0.0286(16) 0.0179(15) 0.0114(14) 0.0081(14) 
C8 0.0289(16) 0.0417(19) 0.0348(18) 0.0244(15) 0.0124(14) 0.0138(14) 
C9 0.0290(16) 0.0321(16) 0.0388(18) 0.0198(14) 0.0187(14) 0.0127(13) 
C10 0.0329(18) 0.0347(19) 0.060(3) 0.0219(18) 0.0188(18) 0.0148(15) 
F1 0.0415(15) 0.0505(16) 0.108(3) -0.0207(17) 0.0214(16) -0.0045(12) 
F2 0.0718(17) 0.0352(12) 0.0562(15) 0.0195(11) 0.0237(13) 0.0269(12) 
F3 0.107(2) 0.0447(14) 0.0427(14) 0.0171(12) 0.0353(15) 0.0308(15) 
F4 0.089(2) 0.140(3) 0.0545(18) 0.057(2) 0.0410(17) 0.049(2) 
F5 0.0708(19) 0.0691(19) 0.0457(15) 0.0258(14) -0.0114(14) 0.0019(15) 
F6 0.111(3) 0.0602(17) 0.0499(16) 0.0340(14) 0.0041(16) 0.0388(17) 
F7 0.084(3) 0.139(4) 0.058(2) 0.004(2) 0.0100(19) -0.053(3) 
F8 0.059(2) 0.141(4) 0.0555(19) -0.036(2) 0.0037(15) 0.031(2) 
F9 0.146(4) 0.108(3) 0.052(2) 0.011(2) -0.033(2) 0.055(3) 
F10 0.116(3) 0.0604(19) 0.0620(19) 0.0050(15) 0.0144(19) 0.057(2) 
F11 0.0330(12) 0.0443(13) 0.094(2) 0.0332(14) 0.0200(13) 0.0198(10) 
F12 0.0526(16) 0.0478(15) 0.148(3) 0.0598(19) 0.0534(19) 0.0256(12) 
  
_geom_special_details 
; 
 All esds (except the esd in the dihedral angle between two l.s. planes) 
 are estimated using the full covariance matrix.  The cell esds are taken 
 into account individually in the estimation of esds in distances, angles 
 and torsion angles; correlations between esds in cell parameters are only 
 used when they are defined by crystal symmetry.  An approximate (isotropic) 
 treatment of cell esds is used for estimating esds involving l.s. planes. 
; 
  
loop_ 
 _geom_bond_atom_site_label_1 
 _geom_bond_atom_site_label_2 
 _geom_bond_distance 
 _geom_bond_site_symmetry_2 
 _geom_bond_publ_flag 
Ag1 O5 2.228(3) . ? 
Ag1 O1 2.373(2) . ? 
Ag1 O2 2.416(3) 2_755 ? 
Ag1 O3 2.416(2) . ? 
Ag2 O4 2.352(2) . ? 
Ag2 O2 2.391(2) . ? 
Ag2 O3 2.456(2) . ? 
Ag2 O1 2.474(2) . ? 
Ag2 C8 2.624(3) 2_655 ? 
O1 C2 1.258(4) . ? 
O2 C4 1.263(4) . ? 
O2 Ag1 2.416(3) 2_755 ? 
O3 C7 1.251(4) . ? 
O4 C9 1.239(4) . ? 
O5 C14B 1.345(18) . ? 
O5 C11B 1.396(16) . ? 
O5 C11 1.490(10) . ? 
O5 C14 1.510(11) . ? 
C1 F2 1.324(4) . ? 
C1 F1 1.325(5) . ? 
C1 F3 1.333(5) . ? 
C1 C2 1.533(5) . ? 
C2 C3 1.396(5) . ? 
C3 C4 1.385(5) . ? 
C4 C5 1.534(5) . ? 
C5 F6 1.321(5) . ? 
C5 F5 1.328(5) . ? 
C5 F4 1.329(5) . ? 
C6 F8 1.272(5) . ? 
C6 F7 1.289(6) . ? 
C6 F9 1.324(6) . ? 
C6 C7 1.547(5) . ? 
C7 C8 1.395(5) . ? 
C8 C9 1.418(5) . ? 
C8 Ag2 2.624(3) 2_655 ? 
C9 C10 1.547(5) . ? 
C10 F10 1.308(5) . ? 
C10 F11 1.323(4) . ? 
C10 F12 1.329(5) . ? 
C11 C12 1.453(14) . ? 
C12 C13 1.524(17) . ? 
C13 C14 1.555(16) . ? 
C11B C12B 1.55(2) . ? 
C12B C13B 1.43(2) . ? 
C13B C14B 1.46(4) . ? 
  
loop_ 
 _geom_angle_atom_site_label_1 
 _geom_angle_atom_site_label_2 
 _geom_angle_atom_site_label_3 
 _geom_angle 
 _geom_angle_site_symmetry_1 
 _geom_angle_site_symmetry_3 
 _geom_angle_publ_flag 
O5 Ag1 O1 138.65(11) . . ? 
O5 Ag1 O2 124.13(13) . 2_755 ? 
O1 Ag1 O2 77.64(8) . 2_755 ? 
O5 Ag1 O3 131.48(12) . . ? 
O1 Ag1 O3 81.43(8) . . ? 
O2 Ag1 O3 82.59(9) 2_755 . ? 
O4 Ag2 O2 131.94(9) . . ? 
O4 Ag2 O3 76.21(8) . . ? 
O2 Ag2 O3 149.96(8) . . ? 
O4 Ag2 O1 143.64(8) . . ? 
O2 Ag2 O1 71.61(8) . . ? 
O3 Ag2 O1 78.66(8) . . ? 
O4 Ag2 C8 91.83(10) . 2_655 ? 
O2 Ag2 C8 91.65(10) . 2_655 ? 
O3 Ag2 C8 98.45(10) . 2_655 ? 
O1 Ag2 C8 117.68(10) . 2_655 ? 
C2 O1 Ag1 132.7(2) . . ? 
C2 O1 Ag2 123.5(2) . . ? 
Ag1 O1 Ag2 96.54(8) . . ? 
C4 O2 Ag2 124.6(2) . . ? 
C4 O2 Ag1 130.7(2) . 2_755 ? 
Ag2 O2 Ag1 103.61(9) . 2_755 ? 
C7 O3 Ag1 129.4(2) . . ? 
C7 O3 Ag2 127.3(2) . . ? 
Ag1 O3 Ag2 95.90(9) . . ? 
C9 O4 Ag2 130.7(2) . . ? 
C14B O5 C11B 104.5(11) . . ? 
C14B O5 C11 111.5(9) . . ? 
C11B O5 C11 27.2(7) . . ? 
C14B O5 C14 23.3(8) . . ? 
C11B O5 C14 97.7(8) . . ? 
C11 O5 C14 114.9(6) . . ? 
C14B O5 Ag1 124.2(8) . . ? 
C11B O5 Ag1 127.5(7) . . ? 
C11 O5 Ag1 123.9(4) . . ? 
C14 O5 Ag1 118.8(4) . . ? 
F2 C1 F1 106.9(3) . . ? 
F2 C1 F3 106.0(3) . . ? 
F1 C1 F3 107.9(4) . . ? 
F2 C1 C2 114.4(3) . . ? 
F1 C1 C2 110.5(3) . . ? 
F3 C1 C2 110.9(3) . . ? 
O1 C2 C3 127.6(3) . . ? 
O1 C2 C1 114.6(3) . . ? 
C3 C2 C1 117.7(3) . . ? 
C4 C3 C2 122.4(3) . . ? 
O2 C4 C3 128.7(3) . . ? 
O2 C4 C5 113.5(3) . . ? 
C3 C4 C5 117.7(3) . . ? 
F6 C5 F5 107.0(4) . . ? 
F6 C5 F4 107.3(4) . . ? 
F5 C5 F4 106.3(4) . . ? 
F6 C5 C4 114.5(3) . . ? 
F5 C5 C4 111.3(3) . . ? 
F4 C5 C4 110.1(3) . . ? 
F8 C6 F7 111.8(5) . . ? 
F8 C6 F9 105.9(4) . . ? 
F7 C6 F9 101.3(5) . . ? 
F8 C6 C7 113.3(3) . . ? 
F7 C6 C7 111.1(4) . . ? 
F9 C6 C7 112.7(4) . . ? 
O3 C7 C8 129.3(3) . . ? 
O3 C7 C6 114.8(3) . . ? 
C8 C7 C6 115.8(3) . . ? 
C7 C8 C9 123.4(3) . . ? 
C7 C8 Ag2 99.6(2) . 2_655 ? 
C9 C8 Ag2 92.6(2) . 2_655 ? 
O4 C9 C8 129.5(3) . . ? 
O4 C9 C10 114.2(3) . . ? 
C8 C9 C10 116.2(3) . . ? 
F10 C10 F11 107.7(4) . . ? 
F10 C10 F12 107.4(4) . . ? 
F11 C10 F12 106.1(3) . . ? 
F10 C10 C9 111.7(3) . . ? 
F11 C10 C9 113.8(3) . . ? 
F12 C10 C9 109.6(3) . . ? 
C12 C11 O5 104.7(8) . . ? 
C11 C12 C13 106.7(9) . . ? 
C12 C13 C14 112.0(10) . . ? 
O5 C14 C13 97.5(8) . . ? 
O5 C11B C12B 103.0(13) . . ? 
C13B C12B C11B 114(2) . . ? 
C12B C13B C14B 95(2) . . ? 
O5 C14B C13B 121.7(17) . . ? 
  
_diffrn_measured_fraction_theta_max    0.947 
_diffrn_reflns_theta_full              28.28 
_diffrn_measured_fraction_theta_full   0.947 
_refine_diff_density_max    1.649 
_refine_diff_density_min   -0.662 
_refine_diff_density_rms    0.109 
